# Supplementary material
Source: PubMed Central journal article supplement (PMC10395567)
Supplement: glad080_suppl_supplementary_material.pdf [file glad080_suppl_supplementary_material.pdf]

**Supplemental Materials:** Lower myelin content is associated with lower gait speed in cognitively unimpaired adults

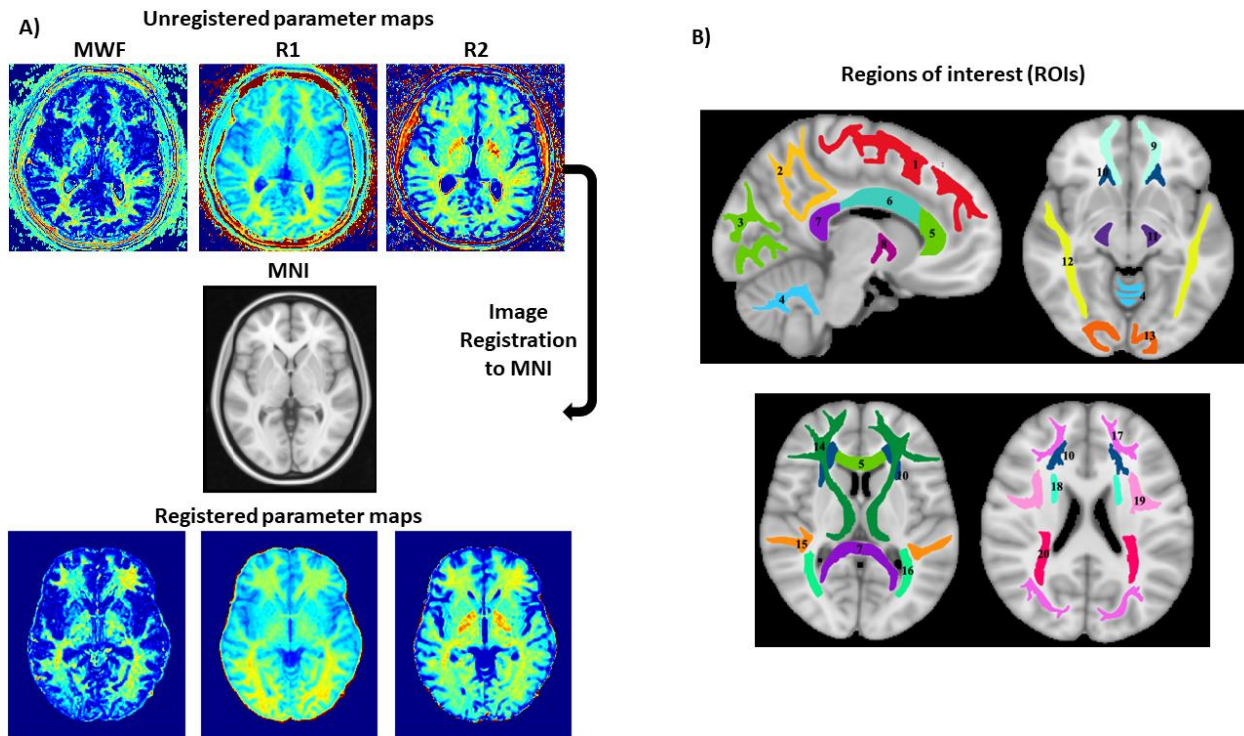

**Supplemental Figure 1.** A) Example of MWF,  $R_1$  and  $R_2$  maps' registration to the MNI space derived from the brain of an 81-year-old man. B) Visualization of the ROIs investigated.

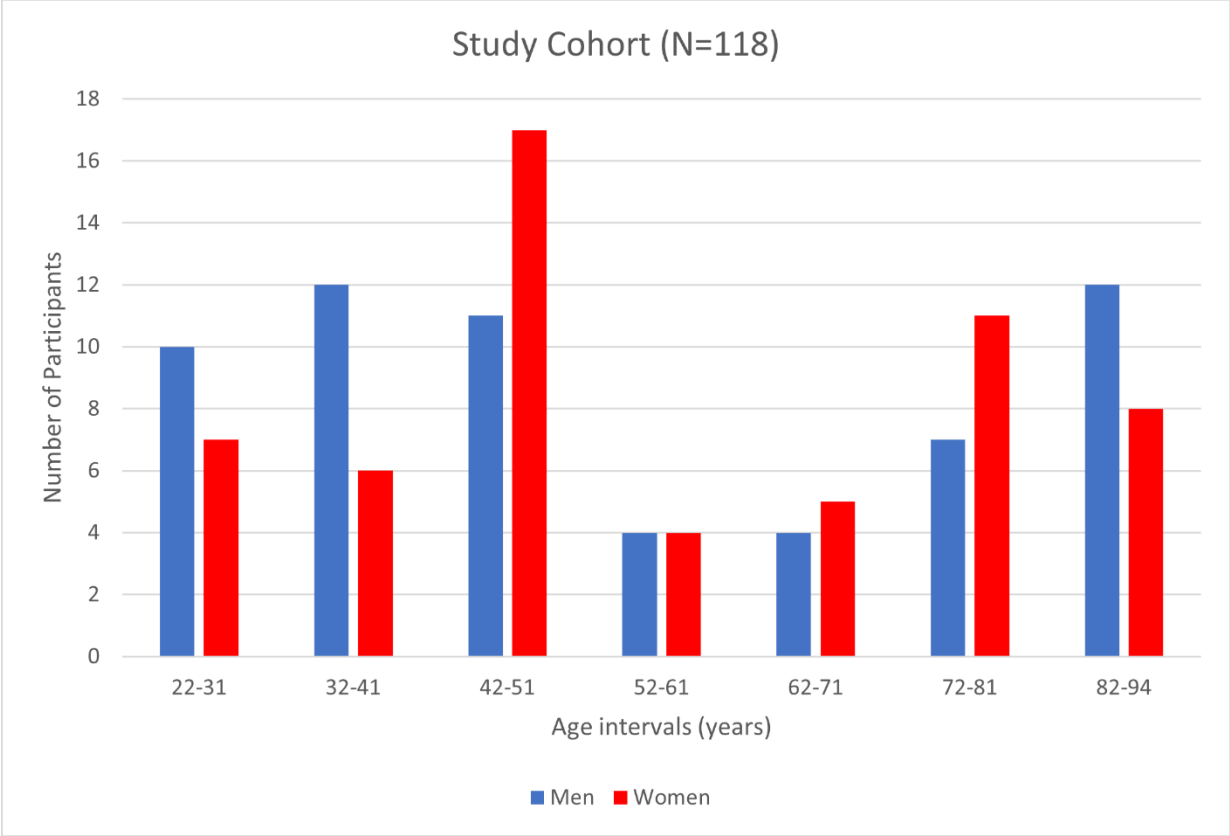

**Supplemental Figure 2.** Number of participants in our study cohort ( $N = 118$ ) per age decade and sex.

**Supplemental Table 1.** Regression coefficients (standard errors) and  $p$ -values (after FDR correction) of MWF and age, sex, race, MMSE, and BMI with respect to RGS for each of the 21 WM ROIs investigated.

| ROIs | MWF                      |                             |                   |                    |                   |                    |
|------|--------------------------|-----------------------------|-------------------|--------------------|-------------------|--------------------|
|      | RGS                      | Age                         | Sex               | Race               | MMSE              | BMI                |
| WB   | 0.25(0.09), <b>0.030</b> | -0.45(0.10), < <b>0.001</b> | 0.10(0.08), 0.357 | -0.06(0.06), 0.386 | -0.01(0.09), 0.99 | -0.05(0.08), 0.635 |
| FL   | 0.28(0.10), <b>0.030</b> | -0.43(0.10), < <b>0.001</b> | 0.10(0.08), 0.357 | -0.06(0.06), 0.386 | -0.02(0.09), 0.99 | -0.04(0.08), 0.635 |
| OL   | 0.15(0.08), 0.086        | -0.53(0.09), < <b>0.001</b> | 0.09(0.08), 0.357 | -0.06(0.06), 0.386 | 0.00(0.09), 0.99  | -0.07(0.08), 0.635 |
| PL   | 0.23(0.09), <b>0.030</b> | -0.46(0.10), < <b>0.001</b> | 0.11(0.08), 0.357 | -0.07(0.06), 0.386 | -0.00(0.09), 0.99 | -0.06(0.08), 0.635 |
| TL   | 0.19(0.09), <b>0.042</b> | -0.50(0.09), < <b>0.001</b> | 0.10(0.08), 0.357 | -0.06(0.06), 0.386 | 0.00(0.09), 0.99  | -0.06(0.08), 0.635 |
| CRB  | 0.18(0.08), <b>0.042</b> | -0.51(0.09), < <b>0.001</b> | 0.09(0.08), 0.357 | -0.08(0.06), 0.386 | 0.01(0.09), 0.99  | -0.08(0.08), 0.635 |
| BCC  | 0.15(0.09), 0.125        | -0.50(0.10), < <b>0.001</b> | 0.09(0.08), 0.357 | -0.06(0.06), 0.386 | -0.01(0.09), 0.99 | -0.07(0.08), 0.635 |
| GCC  | 0.15(0.09), 0.110        | -0.50(0.10), < <b>0.001</b> | 0.08(0.08), 0.358 | -0.05(0.06), 0.388 | -0.00(0.09), 0.99 | -0.07(0.08), 0.635 |
| SCC  | 0.25(0.09), <b>0.030</b> | -0.47(0.09), < <b>0.001</b> | 0.13(0.08), 0.357 | -0.07(0.06), 0.386 | 0.00(0.09), 0.99  | -0.05(0.08), 0.635 |
| IC   | 0.23(0.09), <b>0.030</b> | -0.46(0.10), < <b>0.001</b> | 0.09(0.08), 0.357 | -0.06(0.06), 0.386 | -0.01(0.09), 0.99 | -0.05(0.08), 0.635 |
| CP   | 0.12(0.08), 0.134        | -0.55(0.09), < <b>0.001</b> | 0.09(0.08), 0.357 | -0.06(0.06), 0.386 | 0.00(0.09), 0.99  | -0.08(0.08), 0.635 |
| ACR  | 0.29(0.09), <b>0.022</b> | -0.43(0.10), < <b>0.001</b> | 0.11(0.08), 0.357 | -0.06(0.06), 0.386 | -0.00(0.09), 0.99 | -0.03(0.08), 0.711 |
| PCR  | 0.24(0.09), <b>0.030</b> | -0.45(0.10), < <b>0.001</b> | 0.07(0.08), 0.362 | -0.05(0.06), 0.386 | -0.02(0.09), 0.99 | -0.05(0.08), 0.635 |
| AThR | 0.20(0.09), <b>0.042</b> | -0.49(0.09), < <b>0.001</b> | 0.07(0.08), 0.362 | -0.05(0.06), 0.386 | -0.02(0.09), 0.99 | -0.06(0.08), 0.635 |
| PThR | 0.21(0.09), <b>0.042</b> | -0.46(0.10), < <b>0.001</b> | 0.09(0.08), 0.357 | -0.06(0.06), 0.386 | 0.00(0.09), 0.99  | -0.06(0.08), 0.635 |
| SFOF | 0.34(0.09), <b>0.010</b> | -0.39(0.10), < <b>0.001</b> | 0.07(0.08), 0.362 | -0.05(0.06), 0.413 | -0.03(0.09), 0.99 | -0.04(0.07), 0.635 |
| IFOF | 0.16(0.09), 0.095        | -0.50(0.10), < <b>0.001</b> | 0.07(0.08), 0.362 | -0.06(0.06), 0.386 | -0.00(0.09), 0.99 | -0.06(0.08), 0.635 |
| SLF  | 0.25(0.09), <b>0.030</b> | -0.46(0.10), < <b>0.001</b> | 0.09(0.08), 0.357 | -0.07(0.06), 0.386 | -0.02(0.09), 0.99 | -0.04(0.08), 0.667 |
| ILF  | 0.16(0.09), 0.095        | -0.51(0.09), < <b>0.001</b> | 0.09(0.08), 0.357 | -0.06(0.06), 0.386 | 0.00(0.09), 0.99  | -0.07(0.08), 0.635 |
| FMAJ | 0.22(0.09), <b>0.030</b> | -0.48(0.09), < <b>0.001</b> | 0.10(0.08), 0.357 | -0.07(0.06), 0.386 | 0.00(0.09), 0.99  | -0.06(0.08), 0.635 |
| FMIN | 0.24(0.10), <b>0.030</b> | -0.44(0.10), < <b>0.001</b> | 0.09(0.08), 0.357 | -0.06(0.06), 0.386 | -0.02(0.09), 0.99 | -0.06(0.08), 0.635 |

*Notes.* RGS, rapid gait speed; MWF, myelin water fraction; FDR, false discovery rate; WM, white matter; ROI, region-of-interest; WB, whole brain; FL, frontal lobe; OL, occipital lobe; PL, parietal lobe; TL, temporal lobe; CRB, cerebellum; BCC, body of corpus callosum; GCC, genu of corpus callosum; SCC, splenium of corpus callosum; IC, internal capsule; CP, cerebral peduncle; ACR, anterior corona radiata; PCR, posterior corona radiata; AThR, anterior thalamic radiation; PThR, posterior thalamic radiation; SFOF, superior fronto-occipital fasciculus; IFOF, inferior fronto-occipital fasciculus; SLF, superior longitudinal fasciculus; ILF, inferior longitudinal fasciculus; FMAJ, forceps major; FMIN, forceps minor.

The multiple regression model used is given by:  $RGS \sim \beta_0 + \beta_{age} \times age + \beta_{MRI} \times MRI + \beta_{BMI} \times BMI + \beta_{sex} \times sex + \beta_{race} \times race + \beta_{MMSE} \times MMSE$ , where MRI corresponds to MWF. \*Bold indicates statistical significance ( $p < 0.05$ ).

**Supplemental Table 2.** Regression coefficients (standard errors) and  $p$ -values after FDR correction) of  $R_l$  and age, sex, race, MMSE, and BMI with respect to RGS for each of the 21 WM ROIs investigated.

| ROIs | $R_l$                    |                             |                   |                    |                    |                    |
|------|--------------------------|-----------------------------|-------------------|--------------------|--------------------|--------------------|
|      | RGS                      | Age                         | Sex               | Race               | MMSE               | BMI                |
| WB   | 0.30(0.08), <b>0.004</b> | -0.48(0.09), < <b>0.001</b> | 0.12(0.08), 0.221 | -0.04(0.06), 0.519 | -0.03(0.09), 0.957 | -0.05(0.07), 0.591 |
| FL   | 0.29(0.08), <b>0.004</b> | -0.48(0.09), < <b>0.001</b> | 0.11(0.08), 0.221 | -0.05(0.06), 0.519 | -0.03(0.09), 0.957 | -0.05(0.07), 0.591 |
| OL   | 0.23(0.08), <b>0.005</b> | -0.53(0.09), < <b>0.001</b> | 0.11(0.08), 0.221 | -0.05(0.06), 0.519 | -0.02(0.09), 0.957 | -0.07(0.08), 0.591 |
| PL   | 0.24(0.08), <b>0.007</b> | -0.50(0.09), < <b>0.001</b> | 0.11(0.08), 0.221 | -0.06(0.06), 0.519 | -0.02(0.09), 0.957 | -0.06(0.08), 0.591 |
| TL   | 0.25(0.08), <b>0.005</b> | -0.51(0.09), < <b>0.001</b> | 0.11(0.08), 0.221 | -0.05(0.06), 0.519 | -0.02(0.09), 0.957 | -0.06(0.07), 0.591 |
| CRB  | 0.23(0.08), <b>0.005</b> | -0.54(0.08), < <b>0.001</b> | 0.12(0.08), 0.221 | -0.05(0.06), 0.519 | -0.02(0.09), 0.957 | -0.08(0.07), 0.591 |
| BCC  | 0.29(0.09), <b>0.004</b> | -0.45(0.09), < <b>0.001</b> | 0.12(0.08), 0.221 | -0.04(0.06), 0.519 | -0.01(0.09), 0.957 | -0.06(0.07), 0.591 |
| GCC  | 0.23(0.09), <b>0.011</b> | -0.47(0.09), < <b>0.001</b> | 0.11(0.08), 0.221 | -0.05(0.06), 0.519 | -0.01(0.09), 0.957 | -0.06(0.08), 0.591 |
| SCC  | 0.28(0.08), <b>0.004</b> | -0.50(0.09), < <b>0.001</b> | 0.14(0.08), 0.221 | -0.04(0.06), 0.519 | -0.01(0.09), 0.957 | -0.06(0.07), 0.591 |
| IC   | 0.25(0.08), <b>0.004</b> | -0.49(0.09), < <b>0.001</b> | 0.11(0.08), 0.221 | -0.04(0.06), 0.519 | -0.02(0.09), 0.957 | -0.07(0.07), 0.591 |
| CP   | 0.16(0.08), <b>0.047</b> | -0.56(0.09), < <b>0.001</b> | 0.10(0.08), 0.221 | -0.05(0.06), 0.519 | -0.01(0.09), 0.957 | -0.08(0.07), 0.591 |
| ACR  | 0.30(0.08), <b>0.004</b> | -0.46(0.09), < <b>0.001</b> | 0.11(0.08), 0.221 | -0.04(0.06), 0.519 | -0.02(0.09), 0.957 | -0.03(0.08), 0.686 |
| PCR  | 0.28(0.09), <b>0.004</b> | -0.47(0.09), < <b>0.001</b> | 0.10(0.08), 0.221 | -0.04(0.06), 0.519 | -0.03(0.09), 0.957 | -0.05(0.08), 0.591 |
| AThR | 0.26(0.08), <b>0.005</b> | -0.49(0.09), < <b>0.001</b> | 0.10(0.08), 0.221 | -0.04(0.06), 0.519 | -0.02(0.09), 0.957 | -0.06(0.08), 0.591 |
| PThR | 0.26(0.09), <b>0.005</b> | -0.46(0.09), < <b>0.001</b> | 0.11(0.08), 0.221 | -0.04(0.06), 0.519 | -0.00(0.09), 0.957 | -0.06(0.07), 0.591 |
| SFOF | 0.25(0.08), <b>0.005</b> | -0.48(0.09), < <b>0.001</b> | 0.08(0.08), 0.294 | -0.03(0.06), 0.544 | -0.03(0.09), 0.957 | -0.07(0.08), 0.591 |
| IFOF | 0.24(0.08), <b>0.004</b> | -0.50(0.09), < <b>0.001</b> | 0.09(0.08), 0.237 | -0.04(0.06), 0.519 | -0.01(0.09), 0.957 | -0.05(0.08), 0.591 |
| SLF  | 0.28(0.08), <b>0.004</b> | -0.48(0.09), < <b>0.001</b> | 0.11(0.08), 0.221 | -0.05(0.06), 0.519 | -0.03(0.09), 0.957 | -0.04(0.08), 0.591 |
| ILF  | 0.20(0.09), <b>0.019</b> | -0.52(0.09), < <b>0.001</b> | 0.10(0.08), 0.221 | -0.05(0.06), 0.519 | -0.01(0.09), 0.957 | -0.07(0.08), 0.591 |
| FMAJ | 0.27(0.08), <b>0.004</b> | -0.49(0.09), < <b>0.001</b> | 0.12(0.08), 0.221 | -0.05(0.06), 0.519 | -0.01(0.09), 0.957 | -0.06(0.07), 0.591 |
| FMIN | 0.29(0.09), <b>0.004</b> | -0.47(0.09), < <b>0.001</b> | 0.11(0.08), 0.221 | -0.04(0.06), 0.519 | -0.03(0.09), 0.957 | -0.05(0.07), 0.591 |

*Notes.* RGS, rapid gait speed;  $R_l$ , longitudinal relaxation rate; FDR, false discovery rate; WM, white matter; ROI, region-of-interest; WB, whole brain; FL, frontal lobe; OL, occipital lobe; PL, parietal lobe; TL, temporal lobe; CRB, cerebellum; BCC, body of corpus callosum; GCC, genu of corpus callosum; SCC, splenium of corpus callosum; IC, internal capsule; CP, cerebral peduncle; ACR, anterior corona radiata; PCR, posterior corona radiata; AThR, anterior thalamic radiation; PThR, posterior thalamic radiation; SFOF, superior fronto-occipital fasciculus; IFOF, inferior fronto-occipital fasciculus; SLF, superior longitudinal fasciculus; ILF, inferior longitudinal fasciculus; FMAJ, forceps major; FMIN, forceps minor.

The multiple regression model used is given by:  $RGS \sim \beta_0 + \beta_{age} \times age + \beta_{MRI} \times MRI + \beta_{BMI} \times BMI + \beta_{sex} \times sex + \beta_{race} \times race + \beta_{MMSE} \times MMSE$ , where MRI corresponds to  $R_l$ . \*Bold indicates statistical significance ( $p < 0.05$ ).

**Supplemental Table 3.** Regression coefficients (standard errors) and  $p$ -values after FDR correction) of  $R_2$  and age, sex, race, MMSE, and BMI with respect to RGS for each of the 21 WM ROIs investigated.

| ROIs | $R_2$                    |                             |                   |                    |                    |                    |
|------|--------------------------|-----------------------------|-------------------|--------------------|--------------------|--------------------|
|      | RGS                      | Age                         | Sex               | Race               | MMSE               | BMI                |
| WB   | 0.25(0.09), <b>0.024</b> | -0.43(0.10), < <b>0.001</b> | 0.11(0.08), 0.410 | -0.06(0.06), 0.342 | 0.01(0.09), 0.999  | -0.08(0.08), 0.447 |
| FL   | 0.26(0.10), <b>0.027</b> | -0.42(0.10), < <b>0.001</b> | 0.10(0.08), 0.410 | -0.06(0.06), 0.342 | 0.00(0.09), 0.999  | -0.08(0.08), 0.447 |
| OL   | 0.18(0.09), 0.054        | -0.49(0.09), < <b>0.001</b> | 0.11(0.08), 0.410 | -0.07(0.06), 0.342 | 0.02(0.09), 0.999  | -0.08(0.08), 0.447 |
| PL   | 0.22(0.10), <b>0.048</b> | -0.45(0.10), < <b>0.001</b> | 0.12(0.08), 0.410 | -0.07(0.06), 0.342 | 0.02(0.09), 0.999  | -0.09(0.08), 0.447 |
| TL   | 0.22(0.09), <b>0.029</b> | -0.46(0.10), < <b>0.001</b> | 0.10(0.08), 0.410 | -0.06(0.06), 0.342 | 0.02(0.09), 0.999  | -0.07(0.08), 0.447 |
| CRB  | 0.18(0.08), 0.054        | -0.50(0.09), < <b>0.001</b> | 0.09(0.08), 0.410 | -0.07(0.06), 0.342 | 0.02(0.09), 0.999  | -0.10(0.08), 0.447 |
| BCC  | 0.12(0.09), 0.199        | -0.51(0.10), < <b>0.001</b> | 0.08(0.08), 0.410 | -0.06(0.06), 0.342 | 0.01(0.09), 0.999  | -0.08(0.08), 0.447 |
| GCC  | 0.13(0.10), 0.199        | -0.50(0.10), < <b>0.001</b> | 0.08(0.08), 0.410 | -0.06(0.06), 0.342 | -0.00(0.09), 0.999 | -0.08(0.08), 0.447 |
| SCC  | 0.25(0.09), <b>0.023</b> | -0.46(0.09), < <b>0.001</b> | 0.12(0.08), 0.410 | -0.08(0.06), 0.342 | 0.02(0.09), 0.999  | -0.08(0.08), 0.447 |
| IC   | 0.21(0.09), <b>0.047</b> | -0.46(0.10), < <b>0.001</b> | 0.08(0.08), 0.410 | -0.06(0.06), 0.342 | -0.02(0.09), 0.999 | -0.07(0.08), 0.447 |
| CP   | 0.11(0.08), 0.199        | -0.54(0.09), < <b>0.001</b> | 0.09(0.08), 0.410 | -0.07(0.06), 0.342 | 0.01(0.09), 0.999  | -0.09(0.08), 0.447 |
| ACR  | 0.31(0.09), <b>0.022</b> | -0.41(0.10), < <b>0.001</b> | 0.09(0.08), 0.410 | -0.07(0.06), 0.342 | 0.02(0.09), 0.999  | -0.04(0.08), 0.638 |
| PCR  | 0.20(0.10), 0.057        | -0.47(0.10), < <b>0.001</b> | 0.06(0.08), 0.410 | -0.06(0.06), 0.342 | -0.02(0.09), 0.999 | -0.07(0.08), 0.447 |
| AThR | 0.16(0.09), 0.100        | -0.51(0.10), < <b>0.001</b> | 0.07(0.08), 0.410 | -0.06(0.06), 0.342 | -0.02(0.09), 0.999 | -0.08(0.08), 0.447 |
| PThR | 0.25(0.09), <b>0.024</b> | -0.44(0.10), < <b>0.001</b> | 0.09(0.08), 0.410 | -0.06(0.06), 0.342 | 0.02(0.09), 0.999  | -0.06(0.08), 0.447 |
| SFOF | 0.31(0.10), <b>0.023</b> | -0.39(0.10), < <b>0.001</b> | 0.07(0.08), 0.410 | -0.05(0.06), 0.342 | -0.02(0.09), 0.999 | -0.07(0.07), 0.447 |
| IFOF | 0.17(0.09), 0.072        | -0.49(0.10), < <b>0.001</b> | 0.07(0.08), 0.410 | -0.05(0.06), 0.342 | -0.00(0.09), 0.999 | -0.07(0.08), 0.447 |
| SLF  | 0.27(0.09), <b>0.023</b> | -0.43(0.10), < <b>0.001</b> | 0.11(0.08), 0.410 | -0.07(0.06), 0.342 | 0.00(0.09), 0.999  | -0.06(0.08), 0.470 |
| ILF  | 0.21(0.09), <b>0.043</b> | -0.47(0.10), < <b>0.001</b> | 0.10(0.08), 0.410 | -0.06(0.06), 0.342 | 0.02(0.09), 0.999  | -0.07(0.08), 0.447 |
| FMAJ | 0.26(0.09), <b>0.023</b> | -0.45(0.09), < <b>0.001</b> | 0.10(0.08), 0.410 | -0.07(0.06), 0.342 | 0.02(0.09), 0.999  | -0.06(0.08), 0.447 |
| FMIN | 0.19(0.10), 0.066        | -0.46(0.10), < <b>0.001</b> | 0.08(0.08), 0.410 | -0.06(0.06), 0.342 | -0.01(0.09), 0.999 | -0.08(0.08), 0.447 |

*Notes.* RGS, rapid gait speed;  $R_2$ , transverse relaxation rate; FDR, false discovery rate; WM, white matter; ROI, region-of-interest; WB, whole brain; FL, frontal lobe; OL, occipital lobe; PL, parietal lobe; TL, temporal lobe; CRB, cerebellum; BCC, body of corpus callosum; GCC, genu of corpus callosum; SCC, splenium of corpus callosum; IC, internal capsule; CP, cerebral peduncle; ACR, anterior corona radiata; PCR, posterior corona radiata; AThR, anterior thalamic radiation; PThR, posterior thalamic radiation; SFOF, superior fronto-occipital fasciculus; IFOF, inferior fronto-occipital fasciculus; SLF, superior longitudinal fasciculus; ILF, inferior longitudinal fasciculus; FMAJ, forceps major; FMIN, forceps minor.

The multiple regression model used is given by:  $RGS \sim \beta_0 + \beta_{age} \times age + \beta_{MRI} \times MRI + \beta_{BMI} \times BMI + \beta_{sex} \times sex + \beta_{race} \times race + \beta_{MMSE} \times MMSE$ , where MRI corresponds to  $R_2$ . \*Bold indicates statistical significance ( $p < 0.05$ ).

**Supplemental Table 4.** Regression coefficients (standard errors) and  $p$ -values after FDR correction) of MWF and age, sex, race, MMSE, and BMI with respect to UGS for each of the 21 WM ROIs investigated.

| ROIs | MWF               |                           |                   |                    |                   |                           |
|------|-------------------|---------------------------|-------------------|--------------------|-------------------|---------------------------|
|      | UGS               | Age                       | Sex               | Race               | MMSE              | BMI                       |
| WB   | 0.18(0.10), 0.167 | -0.30(0.10), <b>0.005</b> | 0.08(0.08), 0.530 | -0.05(0.06), 0.588 | 0.10(0.09), 0.348 | -0.20(0.08), <b>0.020</b> |
| FL   | 0.21(0.10), 0.167 | -0.28(0.11), <b>0.011</b> | 0.08(0.08), 0.530 | -0.04(0.06), 0.588 | 0.10(0.09), 0.348 | -0.19(0.08), <b>0.022</b> |
| OL   | 0.10(0.09), 0.279 | -0.36(0.10), <b>0.003</b> | 0.07(0.08), 0.530 | -0.05(0.06), 0.588 | 0.11(0.09), 0.348 | -0.22(0.08), <b>0.020</b> |
| PL   | 0.15(0.10), 0.219 | -0.32(0.10), <b>0.004</b> | 0.08(0.09), 0.530 | -0.05(0.06), 0.588 | 0.11(0.09), 0.348 | -0.21(0.08), <b>0.020</b> |
| TL   | 0.12(0.09), 0.231 | -0.34(0.10), <b>0.004</b> | 0.07(0.08), 0.530 | -0.05(0.06), 0.588 | 0.11(0.09), 0.348 | -0.21(0.08), <b>0.020</b> |
| CRB  | 0.19(0.09), 0.167 | -0.33(0.09), <b>0.004</b> | 0.07(0.08), 0.530 | -0.06(0.06), 0.588 | 0.12(0.09), 0.348 | -0.22(0.08), <b>0.020</b> |
| BCC  | 0.13(0.10), 0.231 | -0.32(0.11), <b>0.005</b> | 0.07(0.08), 0.530 | -0.04(0.06), 0.588 | 0.12(0.09), 0.348 | -0.21(0.08), <b>0.020</b> |
| GCC  | 0.18(0.10), 0.167 | -0.30(0.10), <b>0.005</b> | 0.07(0.08), 0.530 | -0.03(0.06), 0.588 | 0.10(0.09), 0.348 | -0.21(0.08), <b>0.020</b> |
| SCC  | 0.19(0.10), 0.167 | -0.31(0.10), <b>0.004</b> | 0.10(0.08), 0.530 | -0.05(0.06), 0.588 | 0.11(0.09), 0.348 | -0.20(0.08), <b>0.020</b> |
| IC   | 0.14(0.10), 0.227 | -0.33(0.10), <b>0.004</b> | 0.06(0.08), 0.530 | -0.04(0.06), 0.588 | 0.10(0.09), 0.348 | -0.21(0.08), <b>0.020</b> |
| CP   | 0.15(0.08), 0.167 | -0.36(0.09), <b>0.003</b> | 0.08(0.08), 0.530 | -0.05(0.06), 0.588 | 0.11(0.09), 0.348 | -0.22(0.08), <b>0.020</b> |
| ACR  | 0.24(0.10), 0.167 | -0.27(0.10), <b>0.011</b> | 0.08(0.08), 0.530 | -0.05(0.06), 0.588 | 0.11(0.09), 0.348 | -0.18(0.08), <b>0.033</b> |
| PCR  | 0.17(0.10), 0.172 | -0.31(0.11), <b>0.005</b> | 0.06(0.08), 0.530 | -0.04(0.06), 0.588 | 0.09(0.09), 0.348 | -0.20(0.08), <b>0.020</b> |
| AThR | 0.16(0.10), 0.172 | -0.32(0.10), <b>0.004</b> | 0.06(0.08), 0.530 | -0.04(0.06), 0.588 | 0.09(0.09), 0.348 | -0.20(0.08), <b>0.020</b> |
| PThR | 0.16(0.10), 0.197 | -0.31(0.11), <b>0.005</b> | 0.06(0.08), 0.530 | -0.04(0.06), 0.588 | 0.11(0.09), 0.348 | -0.21(0.08), <b>0.020</b> |
| SFOF | 0.24(0.10), 0.167 | -0.26(0.11), <b>0.014</b> | 0.05(0.08), 0.530 | -0.03(0.06), 0.588 | 0.09(0.09), 0.363 | -0.20(0.08), <b>0.020</b> |
| IFOF | 0.12(0.10), 0.231 | -0.34(0.10), <b>0.004</b> | 0.05(0.08), 0.530 | -0.04(0.06), 0.588 | 0.10(0.09), 0.348 | -0.21(0.08), <b>0.020</b> |
| SLF  | 0.12(0.10), 0.249 | -0.34(0.10), <b>0.004</b> | 0.07(0.08), 0.530 | -0.05(0.06), 0.588 | 0.10(0.09), 0.348 | -0.20(0.08), <b>0.020</b> |
| ILF  | 0.11(0.09), 0.266 | -0.35(0.10), <b>0.004</b> | 0.07(0.08), 0.530 | -0.04(0.06), 0.588 | 0.11(0.09), 0.348 | -0.22(0.08), <b>0.020</b> |
| FMAJ | 0.16(0.09), 0.167 | -0.33(0.10), <b>0.004</b> | 0.08(0.08), 0.530 | -0.05(0.06), 0.588 | 0.11(0.09), 0.348 | -0.20(0.08), <b>0.020</b> |
| FMIN | 0.19(0.10), 0.167 | -0.29(0.11), <b>0.008</b> | 0.06(0.08), 0.530 | -0.04(0.06), 0.588 | 0.09(0.09), 0.348 | -0.20(0.08), <b>0.020</b> |

*Notes.* UGS, usual gait speed; MWF, myelin water fraction rate; FDR, false discovery rate; WM, white matter; ROI, region-of-interest; WB, whole brain; FL, frontal lobe; OL, occipital lobe; PL, parietal lobe; TL, temporal lobe; CRB, cerebellum; BCC, body of corpus callosum; GCC, genu of corpus callosum; SCC, splenium of corpus callosum; IC, internal capsule; CP, cerebral peduncle; ACR, anterior corona radiata; PCR, posterior corona radiata; AThR, anterior thalamic radiation; PThR, posterior thalamic radiation; SFOF, superior fronto-occipital fasciculus; IFOF, inferior fronto-occipital fasciculus; SLF, superior longitudinal fasciculus; ILF, inferior longitudinal fasciculus; FMAJ, forceps major; FMIN, forceps minor.

The multiple regression model used is given by:  $UGS \sim \beta_0 + \beta_{age} \times age + \beta_{MRI} \times MRI + \beta_{BMI} \times BMI + \beta_{sex} \times sex + \beta_{race} \times race + \beta_{MMSE} \times MMSE$ , where MRI corresponds to MWF. \*Bold indicates statistical significance ( $p < 0.05$ ).

**Supplemental Table 5.** Regression coefficients (standard errors) and  $p$ -values after FDR correction) of  $R_l$  and age, sex, race, MMSE, and BMI with respect to UGS for each of the 21 WM ROIs investigated.

| ROIs | $R_l$             |                           |                   |                    |                   |                           |  |  |
|------|-------------------|---------------------------|-------------------|--------------------|-------------------|---------------------------|--|--|
|      | UGS               | Age                       | Sex               | Race               | MMSE              | BMI                       |  |  |
| WB   | 0.17(0.09), 0.092 | -0.34(0.10), <b>0.001</b> | 0.08(0.08), 0.421 | -0.03(0.06), 0.687 | 0.09(0.09), 0.346 | -0.21(0.08), <b>0.016</b> |  |  |
| FL   | 0.16(0.09), 0.098 | -0.34(0.10), <b>0.001</b> | 0.07(0.08), 0.421 | -0.04(0.06), 0.687 | 0.09(0.09), 0.346 | -0.21(0.08), <b>0.016</b> |  |  |
| OL   | 0.15(0.09), 0.094 | -0.36(0.09), <b>0.001</b> | 0.08(0.08), 0.421 | -0.04(0.06), 0.687 | 0.10(0.09), 0.346 | -0.21(0.08), <b>0.016</b> |  |  |
| PL   | 0.12(0.09), 0.202 | -0.36(0.10), <b>0.001</b> | 0.07(0.08), 0.421 | -0.04(0.06), 0.687 | 0.10(0.09), 0.346 | -0.22(0.08), <b>0.016</b> |  |  |
| TL   | 0.19(0.09), 0.091 | -0.34(0.09), <b>0.001</b> | 0.08(0.08), 0.421 | -0.03(0.06), 0.687 | 0.09(0.09), 0.346 | -0.21(0.08), <b>0.016</b> |  |  |
| CRB  | 0.19(0.08), 0.091 | -0.37(0.09), <b>0.001</b> | 0.10(0.08), 0.421 | -0.03(0.06), 0.687 | 0.09(0.09), 0.346 | -0.22(0.08), <b>0.016</b> |  |  |
| BCC  | 0.19(0.10), 0.091 | -0.31(0.10), <b>0.003</b> | 0.08(0.08), 0.421 | -0.03(0.06), 0.687 | 0.10(0.09), 0.346 | -0.21(0.08), <b>0.016</b> |  |  |
| GCC  | 0.18(0.10), 0.091 | -0.31(0.10), <b>0.003</b> | 0.09(0.08), 0.421 | -0.04(0.06), 0.687 | 0.10(0.09), 0.346 | -0.21(0.08), <b>0.016</b> |  |  |
| SCC  | 0.23(0.09), 0.091 | -0.33(0.09), <b>0.001</b> | 0.11(0.08), 0.421 | -0.03(0.06), 0.687 | 0.10(0.09), 0.346 | -0.20(0.08), <b>0.016</b> |  |  |
| IC   | 0.19(0.09), 0.091 | -0.33(0.09), <b>0.001</b> | 0.08(0.08), 0.421 | -0.03(0.06), 0.687 | 0.09(0.09), 0.346 | -0.21(0.08), <b>0.016</b> |  |  |
| CP   | 0.19(0.08), 0.091 | -0.38(0.09), <b>0.001</b> | 0.09(0.08), 0.421 | -0.03(0.06), 0.687 | 0.10(0.09), 0.346 | -0.22(0.08), <b>0.016</b> |  |  |
| ACR  | 0.22(0.09), 0.091 | -0.31(0.10), <b>0.002</b> | 0.08(0.08), 0.421 | -0.03(0.06), 0.687 | 0.09(0.09), 0.346 | -0.19(0.08), <b>0.026</b> |  |  |
| PCR  | 0.17(0.09), 0.092 | -0.33(0.10), <b>0.001</b> | 0.07(0.08), 0.421 | -0.03(0.06), 0.687 | 0.09(0.09), 0.346 | -0.21(0.08), <b>0.016</b> |  |  |
| AThR | 0.19(0.09), 0.091 | -0.33(0.10), <b>0.001</b> | 0.08(0.08), 0.421 | -0.03(0.06), 0.687 | 0.09(0.09), 0.346 | -0.20(0.08), <b>0.016</b> |  |  |
| PThR | 0.22(0.09), 0.091 | -0.30(0.10), <b>0.003</b> | 0.08(0.08), 0.421 | -0.03(0.06), 0.687 | 0.10(0.09), 0.346 | -0.21(0.08), <b>0.016</b> |  |  |
| SFOF | 0.18(0.09), 0.091 | -0.33(0.10), <b>0.001</b> | 0.06(0.08), 0.468 | -0.02(0.06), 0.687 | 0.09(0.09), 0.346 | -0.21(0.08), <b>0.016</b> |  |  |
| IFOF | 0.17(0.09), 0.091 | -0.34(0.10), <b>0.001</b> | 0.07(0.08), 0.421 | -0.03(0.06), 0.687 | 0.10(0.09), 0.346 | -0.20(0.08), <b>0.016</b> |  |  |
| SLF  | 0.16(0.09), 0.098 | -0.34(0.10), <b>0.001</b> | 0.08(0.08), 0.421 | -0.04(0.06), 0.687 | 0.09(0.09), 0.346 | -0.20(0.08), <b>0.016</b> |  |  |
| ILF  | 0.16(0.09), 0.092 | -0.35(0.09), <b>0.001</b> | 0.08(0.08), 0.421 | -0.03(0.06), 0.687 | 0.10(0.09), 0.346 | -0.21(0.08), <b>0.016</b> |  |  |
| FMAJ | 0.21(0.09), 0.091 | -0.33(0.09), <b>0.001</b> | 0.09(0.08), 0.421 | -0.03(0.06), 0.687 | 0.10(0.09), 0.346 | -0.20(0.08), <b>0.016</b> |  |  |
| FMIN | 0.17(0.09), 0.092 | -0.33(0.10), <b>0.001</b> | 0.08(0.08), 0.421 | -0.03(0.06), 0.687 | 0.09(0.09), 0.346 | -0.21(0.08), <b>0.016</b> |  |  |

*Notes.* UGS, usual gait speed;  $R_l$ , longitudinal relaxation rate; FDR, false discovery rate; WM, white matter; ROI, region-of-interest; WB, whole brain; FL, frontal lobe; OL, occipital lobe; PL, parietal lobe; TL, temporal lobe; CRB, cerebellum; BCC, body of corpus callosum; GCC, genu of corpus callosum; SCC, splenium of corpus callosum; IC, internal capsule; CP, cerebral peduncle; ACR, anterior corona radiata; PCR, posterior corona radiata; AThR, anterior thalamic radiation; PThR, posterior thalamic radiation; SFOF, superior fronto-occipital fasciculus; IFOF, inferior fronto-occipital fasciculus; SLF, superior longitudinal fasciculus; ILF, inferior longitudinal fasciculus; FMAJ, forceps major; FMIN, forceps minor.

The multiple regression model used is given by:  $UGS \sim \beta_0 + \beta_{age} \times age + \beta_{MRI} \times MRI + \beta_{BMI} \times BMI + \beta_{sex} \times sex + \beta_{race} \times race + \beta_{MMSE} \times MMSE$ , where MRI corresponds to  $R_l$ . \*Bold indicates statistical significance ( $p < 0.05$ ).

**Supplemental Table 6.** Regression coefficients (standard errors) and  $p$ -values after FDR correction) of  $R_2$  and age, sex, race, MMSE, and BMI with respect to UGS for each of the 21 WM ROIs investigated.

| ROIs | $R_2$             |                           |                   |                    |                   |                           |  |  |
|------|-------------------|---------------------------|-------------------|--------------------|-------------------|---------------------------|--|--|
|      | UGS               | Age                       | Sex               | Race               | MMSE              | BMI                       |  |  |
| WB   | 0.17(0.09), 0.092 | -0.34(0.10), <b>0.001</b> | 0.09(0.08), 0.569 | -0.05(0.06), 0.533 | 0.12(0.09), 0.341 | -0.22(0.08), <b>0.014</b> |  |  |
| FL   | 0.16(0.09), 0.098 | -0.34(0.10), <b>0.001</b> | 0.08(0.08), 0.569 | -0.04(0.06), 0.533 | 0.11(0.09), 0.341 | -0.22(0.08), <b>0.014</b> |  |  |
| OL   | 0.15(0.09), 0.094 | -0.36(0.09), <b>0.001</b> | 0.08(0.08), 0.569 | -0.05(0.06), 0.533 | 0.12(0.09), 0.341 | -0.22(0.08), <b>0.014</b> |  |  |
| PL   | 0.12(0.09), 0.202 | -0.36(0.10), <b>0.001</b> | 0.10(0.08), 0.569 | -0.05(0.06), 0.533 | 0.13(0.09), 0.341 | -0.23(0.08), <b>0.014</b> |  |  |
| TL   | 0.19(0.09), 0.091 | -0.34(0.09), <b>0.001</b> | 0.08(0.08), 0.569 | -0.05(0.06), 0.533 | 0.12(0.09), 0.341 | -0.22(0.08), <b>0.014</b> |  |  |
| CRB  | 0.19(0.08), 0.091 | -0.37(0.09), <b>0.001</b> | 0.07(0.08), 0.569 | -0.06(0.06), 0.533 | 0.13(0.09), 0.341 | -0.24(0.08), <b>0.014</b> |  |  |
| BCC  | 0.19(0.10), 0.091 | -0.31(0.10), <b>0.003</b> | 0.06(0.08), 0.569 | -0.05(0.06), 0.533 | 0.12(0.09), 0.341 | -0.22(0.08), <b>0.014</b> |  |  |
| GCC  | 0.18(0.10), 0.091 | -0.31(0.10), <b>0.003</b> | 0.06(0.08), 0.569 | -0.04(0.06), 0.533 | 0.10(0.09), 0.341 | -0.22(0.08), <b>0.014</b> |  |  |
| SCC  | 0.23(0.09), 0.091 | -0.33(0.09), <b>0.001</b> | 0.10(0.08), 0.569 | -0.06(0.06), 0.533 | 0.12(0.09), 0.341 | -0.21(0.08), <b>0.014</b> |  |  |
| IC   | 0.19(0.09), 0.091 | -0.33(0.09), <b>0.001</b> | 0.06(0.08), 0.569 | -0.04(0.06), 0.533 | 0.10(0.09), 0.341 | -0.22(0.08), <b>0.014</b> |  |  |
| CP   | 0.19(0.08), 0.091 | -0.38(0.09), <b>0.001</b> | 0.08(0.08), 0.569 | -0.06(0.06), 0.533 | 0.12(0.09), 0.341 | -0.23(0.08), <b>0.014</b> |  |  |
| ACR  | 0.22(0.09), 0.091 | -0.31(0.10), <b>0.002</b> | 0.08(0.08), 0.569 | -0.05(0.06), 0.533 | 0.13(0.09), 0.341 | -0.17(0.08), <b>0.036</b> |  |  |
| PCR  | 0.17(0.09), 0.092 | -0.33(0.10), <b>0.001</b> | 0.05(0.08), 0.569 | -0.04(0.06), 0.533 | 0.09(0.09), 0.341 | -0.21(0.08), <b>0.014</b> |  |  |
| AThR | 0.19(0.09), 0.091 | -0.33(0.10), <b>0.001</b> | 0.05(0.08), 0.569 | -0.04(0.06), 0.533 | 0.10(0.09), 0.341 | -0.22(0.08), <b>0.014</b> |  |  |
| PThR | 0.22(0.09), 0.091 | -0.30(0.10), <b>0.003</b> | 0.06(0.08), 0.569 | -0.04(0.06), 0.533 | 0.12(0.09), 0.341 | -0.21(0.08), <b>0.015</b> |  |  |
| SFOF | 0.18(0.09), 0.091 | -0.33(0.10), <b>0.001</b> | 0.05(0.08), 0.569 | -0.04(0.06), 0.533 | 0.09(0.09), 0.342 | -0.21(0.08), <b>0.014</b> |  |  |
| IFOF | 0.17(0.09), 0.091 | -0.34(0.10), <b>0.001</b> | 0.05(0.08), 0.569 | -0.04(0.06), 0.533 | 0.11(0.09), 0.341 | -0.21(0.08), <b>0.015</b> |  |  |
| SLF  | 0.16(0.09), 0.098 | -0.34(0.10), <b>0.001</b> | 0.08(0.08), 0.569 | -0.05(0.06), 0.533 | 0.11(0.09), 0.341 | -0.20(0.08), <b>0.015</b> |  |  |
| ILF  | 0.16(0.09), 0.092 | -0.35(0.09), <b>0.001</b> | 0.08(0.08), 0.569 | -0.04(0.06), 0.533 | 0.12(0.09), 0.341 | -0.22(0.08), <b>0.014</b> |  |  |
| FMAJ | 0.21(0.09), 0.091 | -0.33(0.09), <b>0.001</b> | 0.08(0.08), 0.569 | -0.05(0.06), 0.533 | 0.13(0.09), 0.341 | -0.20(0.08), <b>0.015</b> |  |  |
| FMIN | 0.17(0.09), 0.092 | -0.33(0.10), <b>0.001</b> | 0.06(0.08), 0.569 | -0.04(0.06), 0.533 | 0.10(0.09), 0.341 | -0.22(0.08), <b>0.014</b> |  |  |

*Notes.* UGS, usual gait speed;  $R_2$ , transverse relaxation rate; FDR, false discovery rate; WM, white matter; ROI, region-of-interest; WB, whole brain; FL, frontal lobe; OL, occipital lobe; PL, parietal lobe; TL, temporal lobe; CRB, cerebellum; BCC, body of corpus callosum; GCC, genu of corpus callosum; SCC, splenium of corpus callosum; IC, internal capsule; CP, cerebral peduncle; ACR, anterior corona radiata; PCR, posterior corona radiata; AThR, anterior thalamic radiation; PThR, posterior thalamic radiation; SFOF, superior fronto-occipital fasciculus; IFOF, inferior fronto-occipital fasciculus; SLF, superior longitudinal fasciculus; ILF, inferior longitudinal fasciculus; FMAJ, forceps major; FMIN, forceps minor.

The multiple regression model used is given by:  $UGS \sim \beta_0 + \beta_{age} \times age + \beta_{MRI} \times MRI + \beta_{BMI} \times BMI + \beta_{sex} \times sex + \beta_{race} \times race + \beta_{MMSE} \times MMSE$ , where MRI corresponds to  $R_2$ . \*Bold indicates statistical significance ( $p < 0.05$ ).
